# Supplementary material for: Calcium-Based Sorbent Carbonation at Low Temperature via Reactive Milling under CO2
Source: MDPI journal article supplement (doi:10.3390/inorganics11050200), 2023-05-03
Supplement: s1 [file s1]

# Supporting Information

## Calcium-based sorbent carbonation at low temperature via reactive milling under CO<sub>2</sub>

Seyed Morteza Taghavi Kouzehkanan<sup>1</sup>, Ehsan Hassani<sup>2</sup>, Farshad Feyzbar-Khalkhali-Nejad<sup>1</sup>, and Tae-Sik Oh<sup>1\*</sup>

<sup>1</sup> Department of Chemical Engineering, Auburn University, Auburn, AL 36849, USA

<sup>2</sup> Manufacturing Excellence Division, International Paper, Prattville, AL 36067, USA

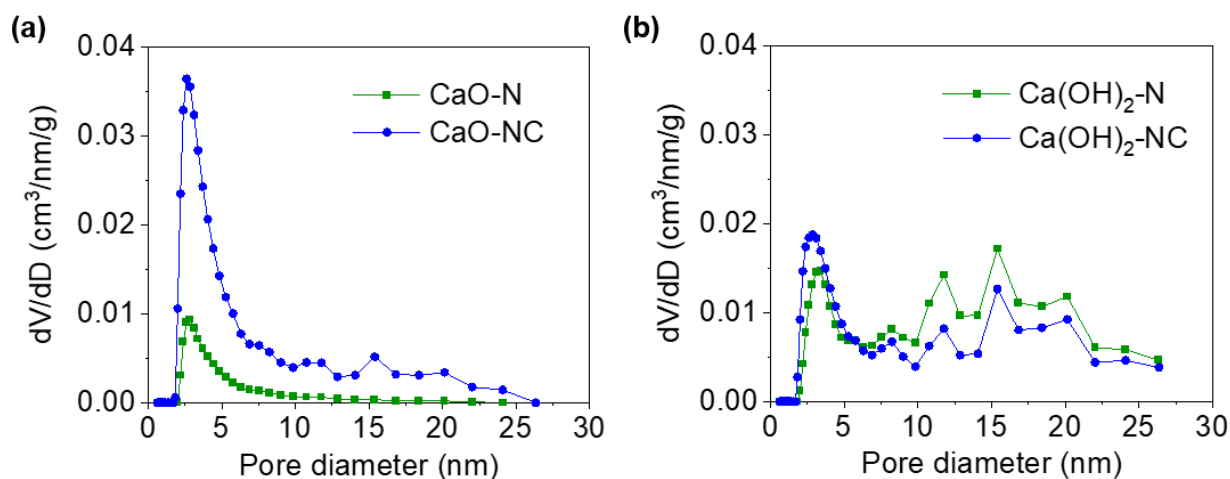

**Figure S1.** Pore diameter distributions of (a) CaO sorbents and (b) Ca(OH)<sub>2</sub> sorbents.

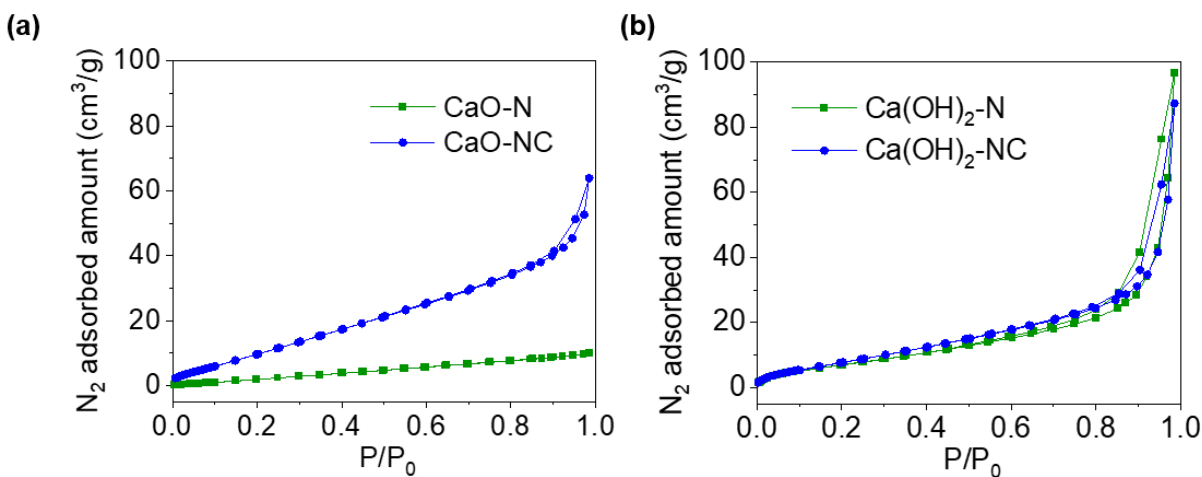

**Figure S2.** Nitrogen adsorption isotherms of (a) CaO sorbents and (b) Ca(OH)<sub>2</sub> sorbents.

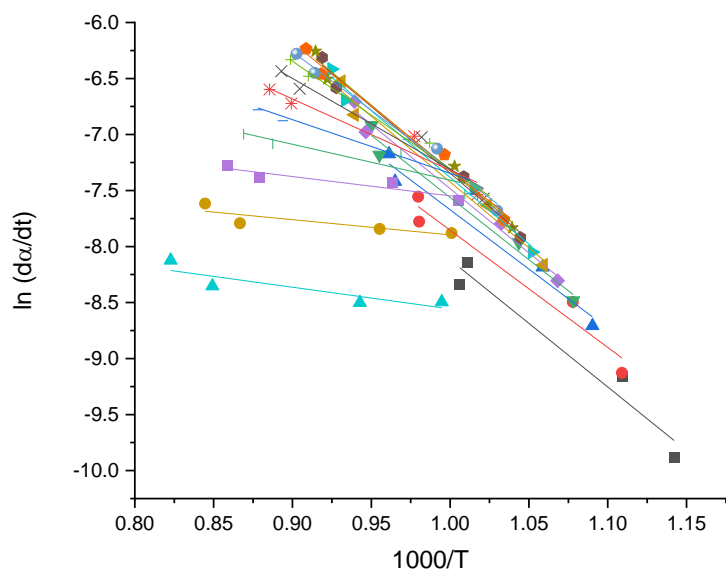

|                          |        |        |        |        |        |        |        |        |        |
|--------------------------|--------|--------|--------|--------|--------|--------|--------|--------|--------|
| $\alpha$                 | 0.1    | 0.15   | 0.2    | 0.25   | 0.3    | 0.35   | 0.4    | 0.45   |        |
| $E_{\alpha}$<br>(kJ/mol) | 86.98  | 88.12  | 92.29  | 95.29  | 97.76  | 98.92  | 98.94  | 97.53  |        |
| R-squared                | 0.9529 | 0.9732 | 0.9793 | 0.9856 | 0.9836 | 0.9856 | 0.9875 | 0.9865 |        |
| $\alpha$                 | 0.5    | 0.55   | 0.6    | 0.65   | 0.7    | 0.75   | 0.8    | 0.85   | 0.9    |
| $E_{\alpha}$<br>(kJ/mol) | 94.31  | 86.77  | 80.05  | 67.41  | 52.91  | 39.79  | 26.61  | 14.35  | 11.29  |
| R-squared                | 0.9865 | 0.9884 | 0.983  | 0.9606 | 0.9253 | 0.857  | 0.8234 | 0.8499 | 0.7322 |

**Figure S3.** Friedman analysis.
